# Supplementary material
Source: Springer Nature journal article supplement (https://www.springermedizin.de/resource/supplementary/13075_2010_2902_MOESM1_ESM.pdf/9693146)

(A)

**gp130 expression**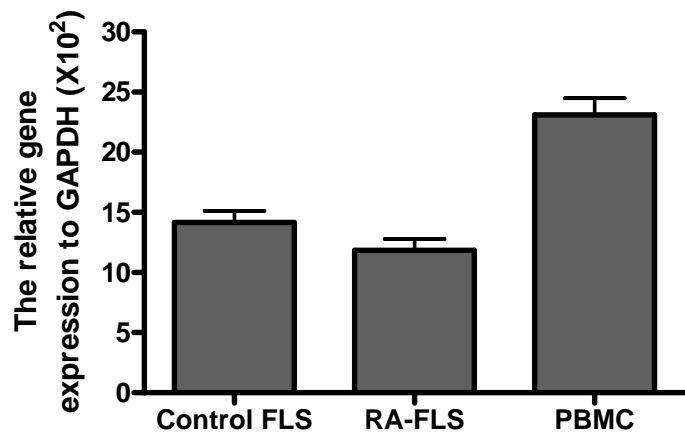

(B)

**WSX-1 expression**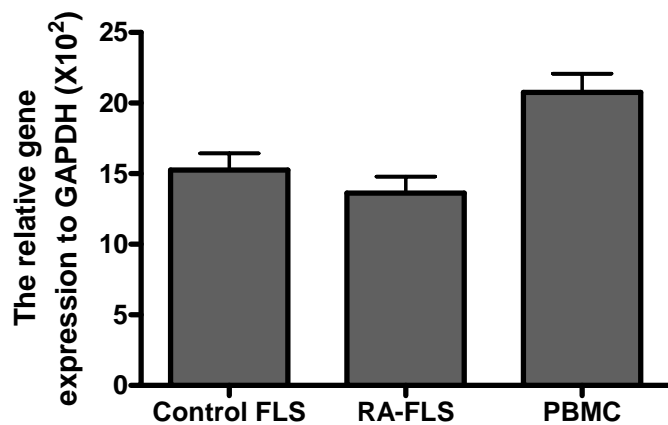

(C)

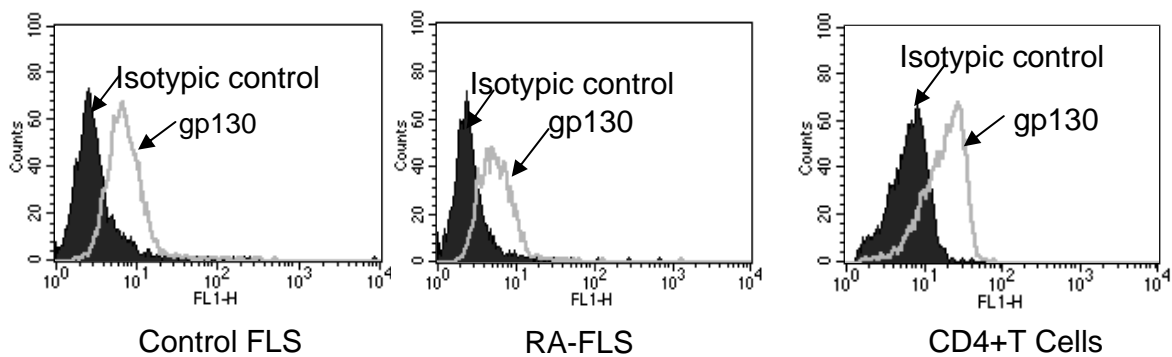

(D)

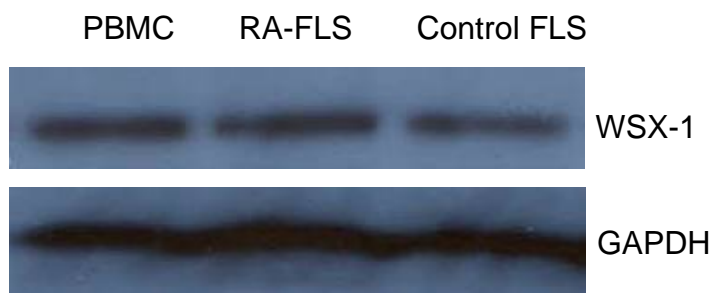

Supplement: MOESM1 [file 9693146]
